# Supplementary material for: The effect of SiO2 additives on solid hydroxide ion-conducting polymer electrolytes: a Raman microscopy study
Source: Royal Society of Chemistry journal article supplement (doi:10.1039/c8cp00262b), 2018-01-01
Supplement: c8cp00262b1.pdf [file c8cp00262b1.pdf]

## **Supplementary Information for**

### **The effect of SiO<sub>2</sub> additives on solid hydroxide ion-conducting polymer electrolytes: A Raman microscopy study**

Jak Li<sup>a\*</sup>, and Keryn Lian<sup>a</sup>

*<sup>a</sup>Department of Materials Science and Engineering, University of Toronto, Toronto, Ontario,  
Canada M5S 3E4*

\* E-mail: [jak.li@mail.utoronto.ca](mailto:jak.li@mail.utoronto.ca)

## Comparison of SiO<sub>2</sub> powders

Table S1: Physical properties of mSiO<sub>2</sub> and nSiO<sub>2</sub>.

| SiO <sub>2</sub> | Particle size | Density (g mL <sup>-1</sup> ) | Surface Area (m <sup>2</sup> g <sup>-1</sup> ) |
|------------------|---------------|-------------------------------|------------------------------------------------|
| Micro-sized      | 44 $\mu$ m    | 2.2                           | 300-350                                        |
| Nano-sized       | 7 nm          | 2.3                           | 370-420                                        |

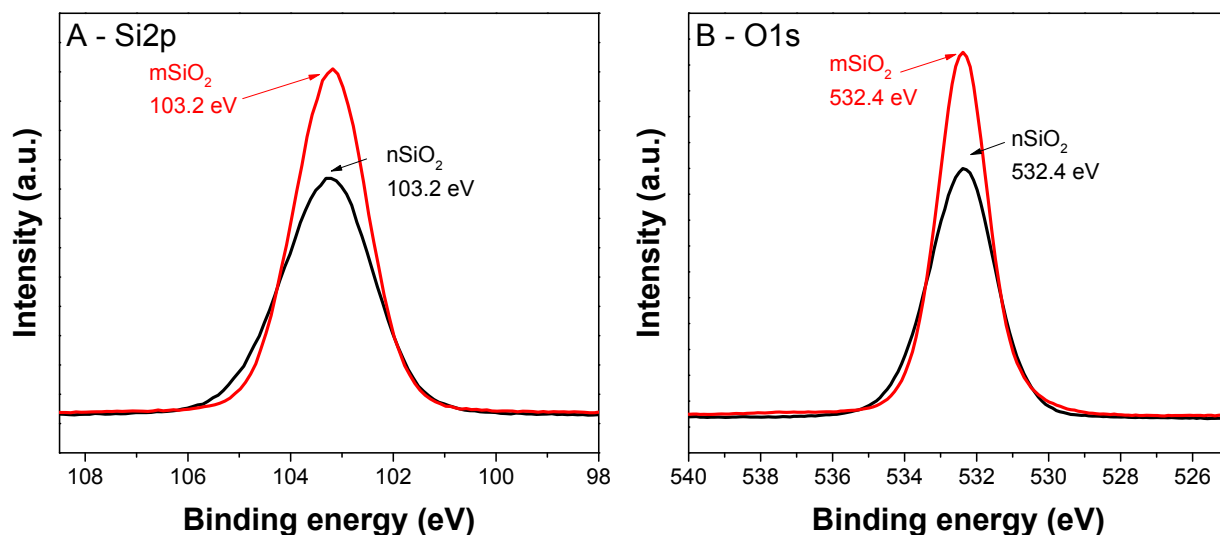

Figure S1: XPS spectra of (A) Si2p and (B) O1s of mSiO<sub>2</sub> and nSiO<sub>2</sub>.

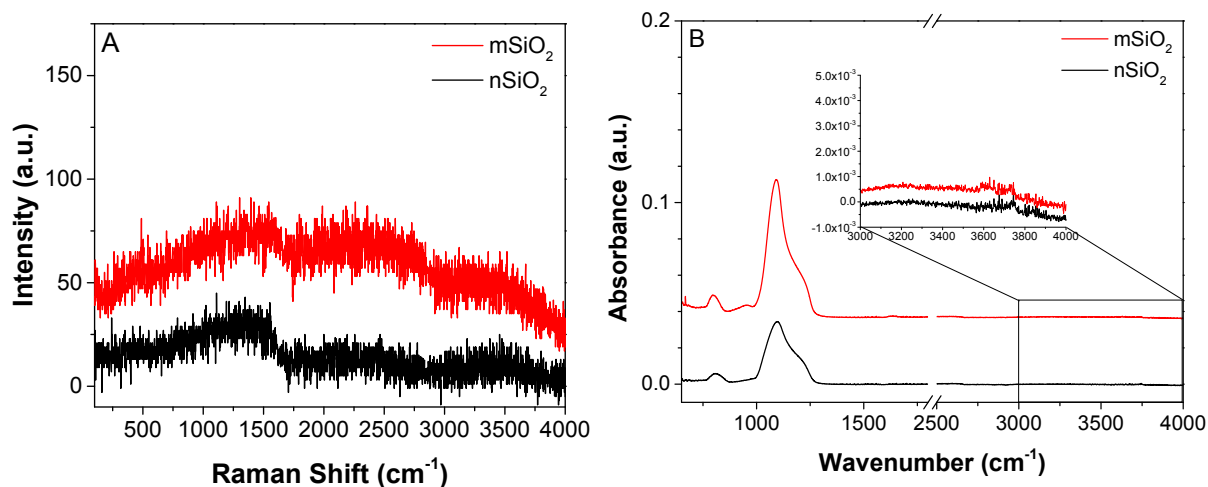

Figure S2: (A) Raman spectra and (B) IR spectra of mSiO<sub>2</sub> and nSiO<sub>2</sub> powders.

Table S1 shows the physical properties of the two SiO<sub>2</sub> powders provided by the supplier. The main difference between the two is the particle size. XPS measurements were performed on the

SiO<sub>2</sub> powders to study their surface chemistries as shown in Fig. S1. The values of the binding energies still fall within the range of SiO<sub>2</sub> as reported in the literature.<sup>1-3</sup> Fig. S2 shows the Raman and FTIR spectra of mSiO<sub>2</sub> and nSiO<sub>2</sub> powders. No chemical stretches were observed from the Raman measurements (Fig. S2A), indicating no unexpected functionalities in the powders. Additionally, the presence of -OH functionality was excluded as the FTIR spectra of both powders revealed no signature in the vibrational frequency region for O-H stretching (Fig. S2B).

### Raman spectra fitting for liquid and solid TEAOH

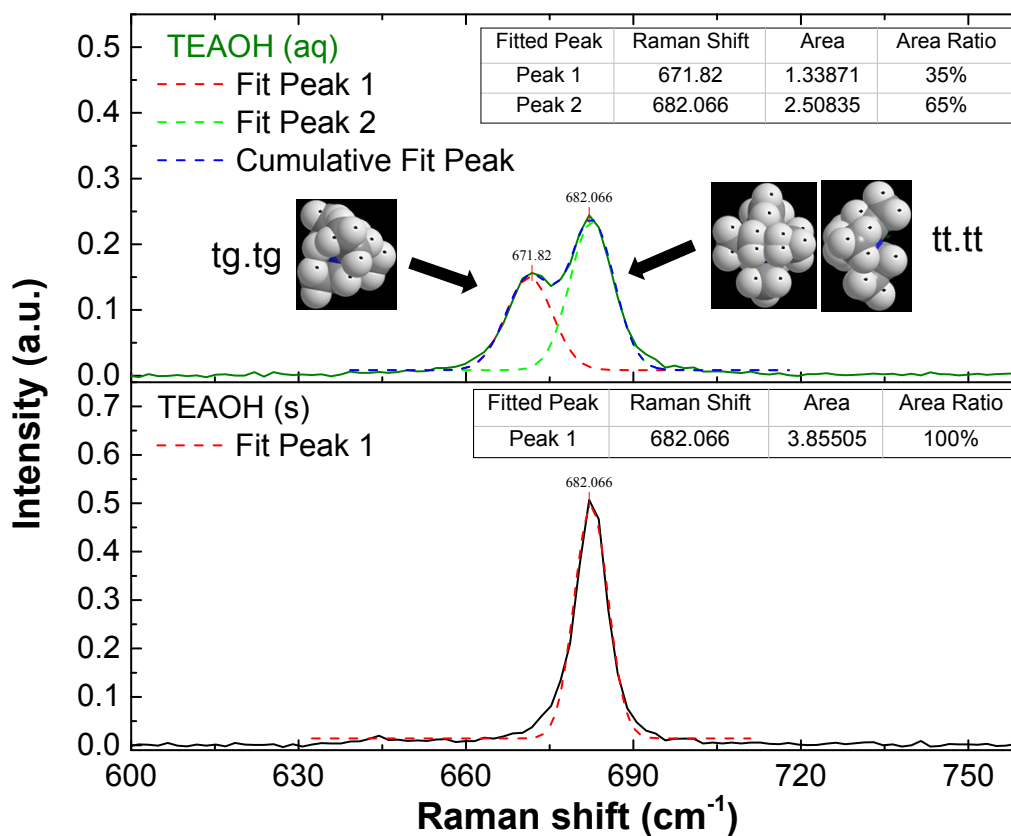

Figure S3: Raman spectra peak fitting of TEAOH<sub>(aq)</sub> and TEAOH<sub>(s)</sub> and their respective content of conformations.

Fig. S3 shows Raman spectra of liquid and solid TEAOH in the region between 600 and 750 cm<sup>-1</sup>. This peak belongs to C<sub>4</sub>N stretch of the TEA cation. The peak split of 672 and 682 cm<sup>-1</sup> corresponds to the *trans-gauche* (tg.tg) and all-*trans* (tt.tt) conformation of TEA, respectively. Here we see that the area ratio gives an indication of how much of the conformation is present in each system.

### Optical images of electrolytes during crystallization

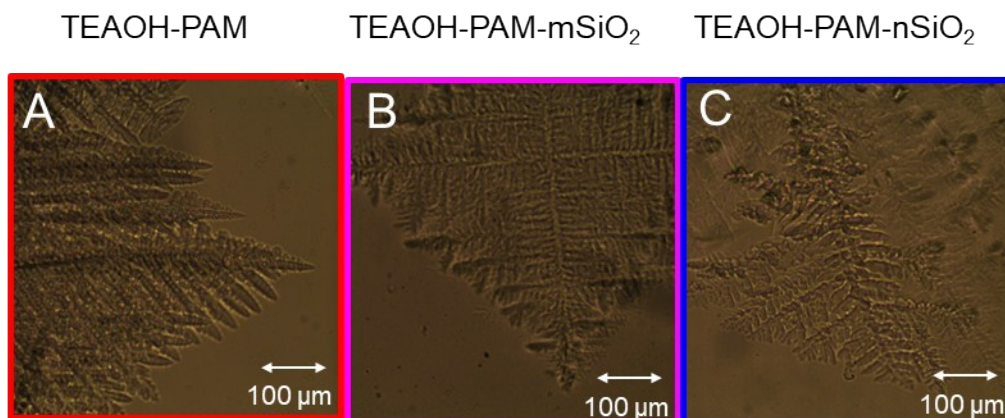

Figure S4: Optical images of the dendrite like crystal growth in (A) TEAOH-PAM, (B) TEAOH-PAM-mSiO<sub>2</sub>, and (C) TEAOH-PAM-nSiO<sub>2</sub>

### References

- 1 E. Paparazzo, M. Fanfoni and E. Severini, Studies on the structure of the SiO<sub>x</sub>/SiO<sub>2</sub> interface, *Appl. Surf. Sci.*, 1992, **56–58**, 866–872.
- 2 R. Alfonsetti, L. Lozzi, M. Passacantando, P. Picozzi and S. Santucci, XPS studies on SiO<sub>x</sub> thin films, *Appl. Surf. Sci.*, 1993, **70–71**, 222–225.
- 3 T. A. Dang and C. N. Chau, Electron spectroscopy for chemical analysis of cool white phosphors coated with SiO<sub>2</sub> thin film, *J. Electrochem. Soc.*, 1996, **143**, 302–305.
